# Supplementary material for: Pathpoint® eDerma: Advancing Teledermatology - A Comprehensive Literature Review and Clinical Evaluation
Source: Preprints.org preprint supplement (doi:10.20944/preprints202405.1527.v2), 2024-05-23
Supplement: Supplementary file 1 [file supplementary]

Archive with 2 entries (2 files):
- Pathpoint® eDerma_Intended Use and Device Description.pdf
- Pathpoint® eDerma_Risk File.xlsx
