# Supplementary material for: Pathpoint® eDerma: Advancing Teledermatology - A Comprehensive Literature Review and Clinical Evaluation
Source: Preprints.org preprint supplement (doi:10.20944/preprints202405.1527.v2), 2024-05-23
Supplement: Supplementary file 1 [file supplementary › Pathpoint® eDerma_Risk File.xlsx]

## Sheet: Cover Sheet
	Document Title:	Document #	Revision	Effective Date
	OM_Medical Device_Pathpoint® eDerma	RF	1	2024-04-25
Review and Approval By
	Name	Signature	Date
Authored By	Balamurugan S	BM	2024-04-24
Approved By	Piyush Mahapatra	PM	2024-04-25
Revision History
Revision Level		DCR#		Effective Date
1		Initial Release		2024-04-25

## Sheet: Risk File
	Document Title:	Document #	Revision	Effective Date
	OM_Medical Device_Pathpoint® eDerma_Risk File	RF	1	2024-04-25
Source of Hazard	Hazard ID	Hazardous Situation (Description of Risk)	Describe Foreseeable Sequence Leading to Hazardous Situation	Risk ID	Describe the Harm due to the Hazardous Situation	Initial Severity Score (S)	Initial Probability of Occurance Score (O)	Initial Risk Priority Number (S*O)	Current/Planned Risk Mitigations	Risk Control Category	Mitigation Traceability	Residual Severity Score (Post Mitigation)	Residual Probability of Occurance (Post Mitigation)	Residual RPN	Risk Benefit Analysis
Usability	H001	User confusion leading to incorrect input.	User confusion due to a non-intuitive design, leading to incorrect data entry or misuse.	R001	Incorrect patient-reported data leading to inaccurate clinical decisions and compromised patient care.	2	3	6	Provide user training on system usage	Training, Usability Study	Usability Report	2	2	4	NA
Usability	H002	Misinterpretation of interface elements causing data entry errors.	User confusion due to a non-intuitive design, leading to incorrect data entry or misuse.	R002	Incorrect patient-reported data leading to inaccurate clinical decisions and compromised patient care.	2	3	6	Improve user interface design to enhance clarity and usability	Design Process, Usability Study	Usability Report; Design documentation; V and V	2	2	4	NA
Design	H003	Incompatibility issues causing data transmission errors.	Incompatibility issues on certain devices, potentially causing data transmission errors or loss.	R003	Data transmission errors may result in incomplete or inaccurate patient records, impacting clinical assessments.	3	3	9	Conduct compatibility testing across various devices	Design Process	Design documentation; V and V	3	1	3	NA
Design	H004	Device-specific vulnerabilities leading to unauthorised access.	Incompatibility issues on certain devices, potentially causing data transmission errors or loss.	R004	Data transmission errors may result in incomplete or inaccurate patient records, impacting clinical assessments.	2	4	8	Implement device-specific security measures	Design Process	Design documentation; V and V	2	2	4	NA
Software	H005	Breach of data security during transmission.	Breach of data security during transmission, compromising patient confidentiality and privacy.	R005	Breach of data security could lead to unauthorised access, compromising patient confidentiality and privacy.	4	3	12	Enhance data encryption during transmission	Software Design Complying to ISO 62304 Standard	Design documentation; V and V	3	1	3	NA
Software	H006	Data loss or compromise due to inadequate encryption measures.	Breach of data security during transmission, compromising patient confidentiality and privacy.	R005	Breach of data security could lead to unauthorised access, compromising patient confidentiality and privacy.	4	3	12	Strengthen encryption protocols to prevent data compromise	Software Design Complying to ISO 62304 Standard	Design documentation; V and V	3	1	3	NA
Regulatory	H007	Non-compliance leading to legal consequences.	Non-compliance with regulations, resulting in legal implications and compromised patient safety.	R006	Non-compliance may result in legal consequences, financial penalties, and reputational damage.	3	3	9	Establish regulatory compliance monitoring processes	Design Process	Design documentation; V and V	3	2	6	NA
Regulatory	H008	Failure to adapt to evolving regulatory standards.	Non-compliance with regulations, resulting in legal implications and compromised patient safety.	R006	Non-compliance may result in legal consequences, financial penalties, and reputational damage.	2	3	6	Regularly update software to meet evolving regulatory standards	Design Process	Design documentation; V and V	2	2	4	NA
Functional	H009	System errors causing failure in delivering critical notifications.	Failure to receive critical notifications due to system errors or misconfigurations.	R007	Failure to receive critical notifications may lead to missed appointments or delayed healthcare interventions.	2	2	4	Implement redundancy in critical notification systems	Process, Usability Study	Usability Report; Design documentation; V and V	2	2	4	NA
Functional	H010	Inconsistent notification preferences leading to missed alerts.	Failure to receive critical notifications due to system errors or misconfigurations.	R007	Failure to receive critical notifications may lead to missed appointments or delayed healthcare interventions.	2	2	4	Allow users to customise notification preferences	Process, Disclaimer, Usability Study	Usability Report; Design documentation; V and V	2	2	4	NA
Usability	H011	Overreliance on reminders causing patient annoyance.	Overreliance on reminders leading to patient annoyance or potential disregard for important notifications.	R008	Overreliance on reminders may cause patient annoyance, potentially leading to disengagement with the reporting process.	2	3	6	Balance reminder frequency to avoid user annoyance	Software Design Complying to ISO 62304 Standard, Training	Usability Report; Design documentation; Regulatory Compliance	2	2	4	NA
Usability	H012	Technical issues leading to the failure of reminder notifications.	Overreliance on reminders leading to patient annoyance or potential disregard for important notifications.	R008	Overreliance on reminders may cause patient annoyance, potentially leading to disengagement with the reporting process.	2	3	6	Regularly maintain reminder notification systems	Software Design Complying to ISO 62304 Standard, Training	Usability Report; Regulatory Compliance	2	2	4	NA
IFU	H013	Inadequate explanation causing patient mistrust.	Inadequate explanation of data usage and privacy, causing patient mistrust or legal issues.	R009	Inadequate explanation of data usage and privacy may lead to patient mistrust and ethical concerns.	2	4	8	Provide clear and comprehensive explanations to users	Software Design Complying to ISO 62304 Standard, Training	Usability Report; Design documentation; Regulatory Compliance	2	2	4	NA
IFU	H014	Failure to obtain explicit consent leading to legal issues.	Inadequate explanation of data usage and privacy, causing patient mistrust or legal issues.	R009	Inadequate explanation of data usage and privacy may lead to patient mistrust and ethical concerns.	2	4	8	Obtain explicit consent from users for data usage	Software Design Complying to ISO 62304 Standard, Training	Regulatory Compliance	2	2	4	NA
Software	H015	Data loss or corruption affecting the accuracy of patient-reported outcomes.	Data loss or corruption, impacting the accuracy of patient-reported outcomes.	R010	Data loss or corruption may result in inaccurate patient-reported outcomes, affecting treatment decisions.	4	3	12	Implement data backup mechanisms to prevent loss or corruption	Software Design Complying to ISO 62304 Standard, Business Continuity Exercise as per ISO 27001 Standard	Regulatory Compliance	3	1	3	NA
Software	H016	System failure leading to the inability to save progress.	Data loss or corruption, impacting the accuracy of patient-reported outcomes.	R010	Data loss or corruption may result in inaccurate patient-reported outcomes, affecting treatment decisions.	4	3	12	Implement auto-save features to prevent data loss during failures	Software Design Complying to ISO 62304 Standard, Business Continuity Exercise as per ISO 27001 Standard	Regulatory Compliance; Design documentation	3	1	3	NA
Security	H017	Unauthorised access due to weak access controls.	Unauthorised access or mishandling of patient data due to system vulnerabilities.	R011	Unauthorised access may lead to privacy breaches, compromising patient confidentiality and trust.	2	4	8	Strengthen access control mechanisms to prevent unauthorised access	Software Design Complying to ISO 62304 Standard, Authentication Requirement as per ISO 27001 Standard, Training	Regulatory Compliance; Design documentation	2	2	4	NA
Security	H018	Mishandling of patient data permissions leading to privacy breaches.	Unauthorised access or mishandling of patient data due to system vulnerabilities.	R011	Unauthorised access may lead to privacy breaches, compromising patient confidentiality and trust.	2	4	8	Enforce strict data handling policies and permissions	Software Design Complying to ISO 62304 Standard, Authentication Requirement as per ISO 27001 Standard, Training	Regulatory Compliance	2	2	4	NA
Documentation	H019	Incomplete or inaccurate information causing user confusion.	Incomplete or inaccurate information in the help center, leading to user confusion.	R012	Incomplete or inaccurate information in support resources may cause user confusion, impacting software utilisation.	3	3	9	Regularly update and review support resources	Design Process, Training	Usability Report; Design documentation; V and V	3	2	6	NA
Documentation	H020	Lack of timely updates leading to outdated support resources.	Incomplete or inaccurate information in the help center, leading to user confusion.	R012	Incomplete or inaccurate information in support resources may cause user confusion, impacting software utilisation.	2	3	6	Establish a schedule for timely updates to support resources	Design Process, Training	Usability Report; Design documentation; V and V	2	2	4	NA
Functional	H021	Incorrect patient filtering impacting patient care.	Incorrect patient filtering or organisation, potentially impacting patient care.	R013	Incorrect patient filtering may lead to oversight in patient care, potentially affecting treatment plans.	2	3	6	Enhance patient filtering mechanisms to prevent errors	Software Design Complying to ISO 62304 Standard, Training	Usability Report; Regulatory Compliance	2	2	4	NA
Functional	H022	Data mismanagement leading to confusion in patient lists.	Incorrect patient filtering or organisation, potentially impacting patient care.	R013	Incorrect patient filtering may lead to oversight in patient care, potentially affecting treatment plans.	2	3	6	Implement clearer data management protocols	Software Design Complying to ISO 62304 Standard, Training	Regulatory Compliance	2	2	4	NA
Design	H023	Misalignment of customised questionnaires with patient needs.	Misalignment of customised questionnaires with patient needs, affecting data accuracy.	R014	Misalignment of customised questionnaires may result in data inaccuracies, impacting clinical assessments.	2	4	8	Align questionnaires with patient needs based on feedback	Software Design Complying to ISO 62304 Standard, Training	Usability Report; Regulatory Compliance	2	2	4	NA
Design	H024	Incorrect application of customisation affecting data accuracy.	Misalignment of customised questionnaires with patient needs, affecting data accuracy.	R014	Misalignment of customised questionnaires may result in data inaccuracies, impacting clinical assessments.	2	4	8	Provide training on customisation features	Software Design Complying to ISO 62304 Standard, Training	Usability Report; Regulatory Compliance	2	2	4	NA
Functional	H025	Data synchronisation errors leading to incomplete patient records.	Data synchronisation errors between the application and the hospital's EHR system.	R015	Data synchronisation errors may result in incomplete patient records, affecting comprehensive patient care.	3	3	9	Improve data synchronisation protocols to ensure completeness	Software Design Complying to ISO 62304 Standard	Regulatory Compliance	3	2	6	NA
Functional	H026	Inability to access EHR data impacting comprehensive patient care.	Data synchronisation errors between the application and the hospital's EHR system.	R015	Data synchronisation errors may result in incomplete patient records, affecting comprehensive patient care.	3	3	9	Establish redundant access points for EHR data	Software Design Complying to ISO 62304 Standard	Regulatory Compliance	3	2	6	NA
Usability	H027	Misinterpretation of visualised data affecting medical decisions.	Misinterpretation of visualised data, potentially leading to incorrect medical decisions.	R016	Misinterpretation of visualised data may lead to incorrect clinical decisions and compromised patient care.	2	4	8	Provide training on data visualisation interpretation	User Training, User Manual	Usability Report	2	2	4	NA
Training	H028	Lack of training leading to improper use of visualisation tools.	Misinterpretation of visualised data, potentially leading to incorrect medical decisions.	R016	Misinterpretation of visualised data may lead to incorrect clinical decisions and compromised patient care.	2	3	6	Offer comprehensive training on visualisation tools	User Training, User Manual	Usability Report	2	2	4	NA
Training	H029	Inadequate training causing misunderstanding of software functionalities.	Inadequate training leading to HCPs misunderstanding software functionalities.	R017	Inadequate training may lead to HCPs misunderstanding software functionalities, potentially compromising patient care.	3	3	9	Develop and provide thorough training materials	Software with Inbuilt Support Request	Regulatory Complinace; Design documentation	3	2	6	NA
Training	H030	Lack of continuous training updates affecting HCP proficiency.	Inadequate training leading to HCPs misunderstanding software functionalities.	R017	Inadequate training may lead to HCPs misunderstanding software functionalities, potentially compromising patient care.	2	3	6	Establish a continuous training program for healthcare providers	Software with Inbuilt Support Request	Regulatory Complinace; Design documentation	2	2	4	NA
Support	H031	Unavailability of support causing delays in issue resolution.	Unavailability of support, causing delays in issue resolution and potential patient care disruption.	R018	Unavailability of support may cause delays in issue resolution, potentially affecting patient care.	2	3	6	Ensure availability of round-the-clock support	Software Development, Usability	Regulatory Complinace; Design documentation; Usability Report	2	2	4	NA
Support	H032	Insufficient support resources impacting overall user satisfaction.	Unavailability of support, causing delays in issue resolution and potential patient care disruption.	R018	Unavailability of support may cause delays in issue resolution, potentially affecting patient care.	2	3	6	Expand support resources to meet user demands	Software Development, Usability	Regulatory Complinace; Design documentation; Usability Report	2	2	4	NA
Functional	H033	Errors in automated data entry leading to inaccuracies.	Errors in automated data entry, leading to inaccuracies in patient records.	R019	Errors in automated data entry may lead to inaccurate patient records, affecting clinical assessments.	4	3	12	Implement validation checks to minimise automated data entry errors	Software Design Complying to ISO 62304 Standard, Usability Testing as per IEC 62366	Regulatory Complinace; Design documentation	3	2	6	NA
Functional	H034	System failure causing disruption in automated data entry processes.	Errors in automated data entry, leading to inaccuracies in patient records.	R019	Errors in automated data entry may lead to inaccurate patient records, affecting clinical assessments.	4	3	12	Develop failover mechanisms to handle system failures	Software Design Complying to ISO 62304 Standard, Usability Testing as per IEC 62366	Regulatory Complinace; Design documentation; Usability Report	3	2	6	NA
Interoperability	H035	Insufficient integration with EHR systems leading to data inconsistency	Inadequate integration protocols result in data synchronisation failures between the eDerma platform and EHR systems.	R020	Inconsistent patient data between the eDerma platform and EHR systems may lead to incorrect diagnoses or treatment plans.	3	3	9	Enhance interoperability protocols for seamless data exchange	Software Design Complying to ISO 62304 Standard, Business Continuity Exercise as per ISO 27001 Standard	Regulatory Complinace; Design documentation	3	2	6	NA
Scalability	H036	Lack of scalability in handling increased patient load	Increased usage of the eDerma platform overwhelms the system, causing slowdowns or crashes.	R021	System slowdowns or crashes due to scalability issues may disrupt patient care and lead to delays in diagnosis or treatment.	4	3	12	Upgrade system infrastructure to handle increased loads	Software Design Complying to ISO 62304 Standard, Business Continuity Exercise as per ISO 27001 Standard	Regulatory Complinace; Design documentation	4	1	4	NA
Security	H037	Inadequate cybersecurity measures leaving patient data vulnerable	Weak cybersecurity protocols make patient data susceptible to unauthorised access or breaches.	R022	Unauthorised access or breaches of patient data due to inadequate cybersecurity measures may compromise patient privacy and trust in the platform.	4	3	12	Strengthen cybersecurity measures to protect patient data	Software Design Complying to ISO 62304 Standard, Authentication Requirement as per ISO 27001 Standard, Training	Regulatory Complinace; Design documentation	4	1	4	NA
Interoperability	H038	Lack of interoperability with other healthcare systems	Incompatibility with other healthcare systems prevents seamless data exchange and collaboration.	R023	Inability to exchange data seamlessly with other healthcare systems may hinder communication among healthcare providers and impede patient care coordination.	3	3	9	Improve interoperability standards to facilitate data exchange	Software Design Complying to ISO 62304 Standard, Authentication Requirement as per ISO 27001 Standard, Training	Regulatory Complinace; Design documentation	3	2	6	NA
Usability	H039	Complexity in user interface hindering user adoption	Overly complex user interface design makes it difficult for users to navigate and perform tasks efficiently.	R024	Difficulty in navigating the platform due to complex user interface design may result in user frustration and reduced adoption among healthcare professionals.	3	3	9	Simplify user interface design for easier adoption	Design Process	Design documentation	2	2	4	NA
Usability	H040	Insufficient error handling mechanisms leading to data loss	Inadequate error handling procedures result in data loss during critical operations.	R025	Data loss during critical operations due to insufficient error handling mechanisms may compromise patient data integrity and clinical decision-making.	3	3	9	Implement robust error handling mechanisms to prevent data loss	Design Process	Regulatory Complinace; Design documentation	3	1	3	NA

## Sheet: Risk Report Final
	Document Title:	Document #	Revision	Effective Date
	OM_Medical Device_Pathpoint® eDerma	RF	1	2024-04-25
Hazard Description	No of Identified Risks	Evaluation			Acceptable / Unacceptable
		Low	Medium	High
Usability	6	6	0	0	Acceptable
Design	4	4	0	0	Acceptable
Software	5	5	0	0	Acceptable
Regulatory	2	1	1	0	Acceptable
Functional	8	6	2	0	Acceptable
Security	3	3	0	0	Acceptable
Documentation	2	1	1	0	Acceptable
Interoperability	2	0	2	0	Acceptable
Scalability	1	1	0	0	Acceptable
Training & IFU	5	4	1	0	Acceptable
Support	2	2	0	0	Acceptable
Total Hazards	40	33	7	0	Acceptable
Overall Risk Benefit Analysis:	No formal risk benefit analysis is deemed necessary since all identified risks have been mitigated to an acceptable level. However, it's noted that there are minor clinical risks that will be addressed through post-market surveillance
Describe Production and Post Production Data Methods in Place:
1. Post-Market Surveillance:
Continuous Monitoring:	Our post-market surveillance (PMS) process involves continuous monitoring of the product's performance and safety once it's deployed in the market. This includes gathering feedback from users, monitoring adverse events, and analysing real-world usage data to identify any potential issues or safety concerns.
Adverse Event Reporting:	We have established mechanisms for users and stakeholders to report adverse events or incidents encountered during product usage. These reports are carefully reviewed and investigated to determine the root cause and assess any potential risks to patient safety or product effectiveness.
Regulatory Compliance:	Our PMS activities are conducted in compliance with regulatory requirements and guidelines. We ensure timely reporting of any adverse events to regulatory authorities and take appropriate corrective actions as necessary to address identified risks.
Risk Assessment and Mitigation:	The data collected through post-market surveillance activities are used to perform risk assessments and prioritise mitigation efforts. This may involve implementing software updates, issuing safety communications, or revising product labeling to enhance safety and usability.
2. Customer Support:
Dedicated Support Team:	We have a dedicated customer support team available to assist users with any questions, issues, or concerns they may have regarding the product. Our support representatives are trained to provide timely and effective assistance to ensure a positive user experience.
Multi-channel Support:	Users can reach our customer support team through various channels, including phone, email, and online chat. We also provide self-service resources such as knowledge bases and user forums to empower users to find answers to common questions independently.
Ticketing System:	We utilise Jira, a robust ticketing system, to track and manage customer requests and support tickets. Each customer inquiry or issue is logged as a Jira ticket, allowing our support team to efficiently prioritise, assign, and track the resolution of each request.
SLA Adherence:	We adhere to service level agreements (SLAs) to ensure timely response and resolution of customer inquiries and issues. Our support team follows established protocols and workflows to meet or exceed SLA targets and provide high-quality support services.
Overall, our post-market surveillance process and customer support system are integral parts of our commitment to product quality, safety, and customer satisfaction. By proactively monitoring product performance, addressing user feedback, and providing responsive customer support, we strive to ensure the continued success of our product in meeting the needs of our users and maintaining compliance…

## Sheet: Risk Report
	Document Title:	Document #	Revision	Effective Date
	OM_Medical Device_Pathpoint Outcomes_Risk File	FORM_10.02	A0
Hazard Description	# Identified Risks	Evaluation			Acceptable/ Unacceptable
		Low	Medium	High
Biological Hazard	0				NA
Chemical Hazard	0				NA
Functional Hazard					Acceptable
Operational Hazard					Acceptable
Mechanical Hazard	0				NA
Labeling Hazard					Acceptable
Electromagnetic Hazard	0				NA
Biocompatability Hazard	0				NA
Thermal Hazard	0				NA
Fire Hazard	0				NA
Clinical Hazard					Acceptable
Cybersecurity Hazard					Acceptable
Use Error Hazard					Acceptable
Overall Risk Benefit Analysis: Provide Detail of Risk Benefit Analysis at the overall system level
Describe Production and Post Production Data Methods in Place: Provide details on how the production and post production data will be monitored and how analysis of those data provide input towards risk analysis
Review and Approval
Review by	Name	Date	Sign
Approved by	Name	Date	Sign

## Sheet: Not for review
	Document Title:	Document #	Effective Date
	Risk File and Report	OM_Medical Device_Risk File	Not Yet
Source of Hazard	Hazard Description	Hazard ID	Describe foreseeable sequence leading to hazardous situation	Risk ID	Describe the Harm due to the hazardous situation	Initial Severity Score (S)	Initial Probability of Occurance Score (O)	Initial Risk Priority Number (S*O)	Current/Planned Risk Mitigations	Risk Control Category	Mitigation Traceability	Residual Severity Score (Post Mitigation)	Residual Probability of Occurance (Post Mitigation)	Residual RPN	Risk Benefit Analysis	https://www.cognitiveclouds.com/insights/7-common-risks-and-solutions-for-mobile-app-security/	cloud problem, data lost
			The user may not be able to read and understand the instruction	R001	Device Misuse	2	2	4	1. The software application will be designed in such a way that the fonts are clearly visibile and legible for a normal human eye 2. Clear instructions for use will be given in the software application for users	Design Control and Instructions	1. Design Control 2. IFU	1	1	1	NA
			User will not be able to debug issues	R002	User Annoyance	3	2	6	1. The software application will be properly designed with troubleshooting mechanism for small errors and will be tested properly	Software design complying to ISO 62304 Standard	Design Control	1	1	1	NA
			Users health information will be exposed	R003	1. Data/Security breach of users	3	4	12	The software application will be designed in such a way that other applications cannot track data of oursoftware application	Software Design	Design Control	2	2	4	NA
			The user may not be able to understand the warning	R001	Device misuse	2	2	4	1. The software application will be designed in such a way that the color combinations used are visibile and legible for a normal human eye	Design Control	Design Control	1	1	1	NA
			Based on the upgrades the software feature may not perform as expected	R004	Device malfunction
			The output of the algorithm may be inaccurate		False Positive
					False Negative
			The ECG morphology can me misinterpreted by the user	R001 / R005	1. User Annoyance 2. Misdiagnosis	3	4	12	The screen resolution of the smart device will be taken into account while designing the software application 2. Clear instruction will be given in the user manual about the intended use of the device	Software design control	Design Control	2	1	2	NA
			1. The user might take unnecessary medical advice from physician 2. The user has to go through unwanted tests and can get stressed	R001 / R005	1. User Annoyance 2. Misdiagnosis	4	2	8	1. The software application for arrhythmia classification will undergo 60601-2-47 regulatory compliance for assuring the quality of ECG 2. The user manual will clearly postulate the intended used of the software application and say that it is not intended for diagnostic purpose	Design and instructions to use	Regulatory compliance, design control and instructions to use	3	2	6	NA
			The algorithm may not perform accurately leading to inaccurate output		False Positive
					False Negative
			The algorithm may not perform accurately leading to inaccurate output		False Positive
					False Negative
			Algorithm will not process the data		Delay in diagnosis
			Algorithm may not perform as intended		False Positive
					False Negative
